# Supplementary material for: Divergent Gray Matter Changes in Insomnia Disorder: Anxiety-Linked Hypertrophy and Sleep-Related Atrophy
Source: Research Square preprint supplement (doi:10.21203/rs.3.rs-7448016/v1), 2025-10-01
Supplement: Supplementary file 1 [file 30c488f3bf3b1334479dd6a3.pdf]

# Author Declaration Form

## *Brain Imaging and Behavior*

Manuscript ID number (if available): \_\_\_\_\_

**Title:** Divergent Gray Matter Changes in Insomnia Disorder: Anxiety-Linked Hypertrophy and Sleep-Related Atrophy.

Name of **First Author:** Yuting Wu, Lifeng Hang, Wenqing Xiao.

**E-mail address** of First Author: 2801147975@qq.com; hanglf@ustc.edu.cn; 1519776940@qq.com.

Name of **Corresponding Author:** Shumei Li, Guihua Jiang.

**E-mail address** of Corresponding Author: shumeili0412@qq.com; gh.jiang2002@163.com.

### **AUTHORSHIP**

I, the undersigned author(s), certify that:

1. I have read and approved the final version of the manuscript.
2. I have made substantial contributions to the submitted work, which may include study design, data acquisition and/or analysis, and data interpretation.
3. I have made significant contributions to the preparation of the manuscript and/or critical revisions for important intellectual content.
4. I will be accountable for all aspects of the submitted work, or I am accountable for the following specific aspects of the submitted work:

All aspects. \_\_\_\_\_

5. I agree to help investigate and resolve any issues/questions that may arise regarding the accuracy and integrity of the submitted work.

I understand that if necessary, the Editor-in-Chief of *Brain Imaging and Behavior* or designate may request deidentified data that has been submitted as part of the manuscript. In this event, I agree to produce the data.

I certify that this manuscript is not under consideration for publication in any other journal, nor has it been accepted for publication in any form, and no rights have been assigned to a third party.

I certify that all individuals who have made specific contributions to this manuscript but who do not fulfill the authorship criteria are listed with their specific contributions in the Acknowledgments section of the manuscript.

# Author Declaration Form

## *Brain Imaging and Behavior*

All funding sources directly or indirectly supporting this research have been acknowledged within the manuscript, including grant numbers where appropriate.

I understand that after the initial submission, authorship changes are strongly discouraged unless clearly warranted. If a major revision is submitted and authors have been added, removed or reordered, a rationale must be clearly indicated on the authorship change form, and all authors, prior and newly proposed, must sign the form indicating their agreement. Original signatures are required. Changes are subject to approval by the Editor-in-Chief.

### CONFLICT OF INTEREST AND FINANCIAL DISCLOSURE

Within this manuscript, I agree to disclose any potential conflicts of interest, financial or otherwise, that might be perceived as influencing the objectivity of my work.

⇒ Potential sources of conflict include but are not limited to patents, copyrights, royalties, or stock ownership, membership on a company's board of directors, membership on a company's advisory board, and consultancy or speaker's fees from a company.

I understand that the conflict of interest section is to be placed at the end of the manuscript and may be stated as shown in the following example:

John Doe currently receives royalties from pharmaceutical company X for the use of his patent.

Jane Doe has no conflicts of interest to report.

If none of the authors have disclosures to report, a single line may be added that states, "None of the authors have a conflict of interest to declare."

None of the authors have a conflict of interest to declare. \_\_\_\_\_

By signing this document, I agree to accept full responsibility for the work submitted in the manuscript, including the accuracy and integrity of the data and data analyses.

Additionally, I assert that there are no conflicts of interest, either personal or institutional, that have compromised the integrity of the work reported in this manuscript.

Author's Signature

Yuting Wu

Author's Printed Name and Date

Yuting Wu 2025.08.25

Author's Signature

Lifeng Hang

Author's Printed Name and Date

Lifeng Hang 2025.08.25

**Author Declaration Form**  
***Brain Imaging and Behavior***

Author's Signature

Wengqing Xiao

Author's Printed Name and Date

Wengqing Xiao 2025.08.25

Author's Signature

Liping Pan

Author's Printed Name and Date

Liping Pan 2025.08.25

Author's Signature

Chulan Lin

Author's Printed Name and Date

Chulan Lin 2025.08.25

Author's Signature

Wenfeng Zhan

Author's Printed Name and Date

Wenfeng Zhan 2025.08.25

Author's Signature

Liming Li

Author's Printed Name and Date

Liming Li 2025.08.25

Author's Signature

Shujuan Qin

Author's Printed Name and Date

Shujuan Qin 2025.08.25

Author's Signature

Shumei Li

Author's Printed Name and Date

Shumei Li 2025.08.25

Author's Signature

Guihua Jiang

Author's Printed Name and Date

Guihua Jiang 2025.08.25

Please note: A completed and signed copy of this form must be included with the submission. If authors are in multiple locations, more than one form may be used and submitted with the manuscript.
